# Supplementary material for: Identification of N-linked glycans as specific mediators of neuronal uptake of acetylated α-Synuclein
Source: PLoS Biol. 2019 Jun 18;17(6):e3000318. doi: 10.1371/journal.pbio.3000318 (PMC6599126; doi:10.1371/journal.pbio.3000318)
Supplement: S1 Data — (XLSX) [file pbio.3000318.s001.xlsx]

## Sheet: 1B
	αSacetylPFF	αSunPFF			αSacetylPFF	αSunPFF
Day 3 (rep 1)	1300.95	451.35		Day 7 (rep 1)	5103.18	451.81
Day 3 (rep 2)	1901.55	251.55		Day 7 (rep 2)	5616.19	1312.29
Day 3 (rep 3)	1025.58	432.28		Day 7 (rep 3)	4921.36	905.11
Day 3 (average)	1409.36	378.393		Day 7 (average)	5213.58	889.737
STDEV	437.985	90.029		STDEV	294.208	351.458

## Sheet: 2C
αSacetyl								αSun								αSacetyl + PNGase F								αSun + PNGaseF
time (h)	0.5	1	3	5	8	12	24	time (h)	0.5	1	3	5	8	12	24	time (h)	0.5	1	3	5	8	12	24	time (h)	0.5	1	3	5	8	12	24
N (in solution) 1	183	109	61	31	40	45	10	N (in solution) 1	155	143	131	102	82	78	26	N (in solution) 1	195	179	159	154	141	137	110	N (in solution) 1	167	165	149	104	96	75	55
N (in solution) 2	179	100	76	33	28	21	33	N (in solution) 2	162	161	144	92	71	51	38	N (in solution) 2	185	183	184	157	160	149	120	N (in solution) 2	171	166	140	118	86	59	41
N (in solution) 3	189	120	50	20	20	19	28	N (in solution) 3	164	151	161	112	57	42	44	N (in solution) 3	191	186	167	168	149	141	125	N (in solution) 3	165	150	160	109	72	53	25
N (in solution) Average	183.667	109.667	62.3333	28	29.3333	28.3333	23.6667	N (in solution) Average	160.333	151.667	145.333	102	70	57	36	N (in solution) Average	190.333	182.667	170	159.667	150	142.333	118.333	N (in solution) Average	167.667	160.333	149.667	110.333	84.6667	62.3333	40.3333
N (in solution) Average STDEV	4.10961	8.17856	10.6562	5.71548	8.21922	11.8134	9.87702	N (in solution) Average STDEV	3.85861	7.36357	12.2837	8.16497	10.2307	15.2971	7.48331	N (in solution) Average STDEV	4.10961	2.86744	10.4243	6.01849	7.78888	4.98888	6.2361	N (in solution) Average STDEV	2.49444	7.31817	8.17856	5.79272	9.84322	9.28559	12.2565
αSacetyl PFF								αSun PFF								αSacetyl PFF + PNGaseF								αSun PFF + PNGaseF
time (h)	1	3	5	8	12	24		time (h)	1	3	5	8	12	24		time (h)	1	3	5	8	12	24		time (h)	1	3	5	8	12	24
puncta per cell 1	19.2	36.2	36.3	35.2	38.6	23.5		puncta per cell 1	7.4	21.725	26.51	26.4	30.4	33.4		puncta per cell 1	3.4	5.2	4.2	1.8	9.1	11.1		puncta per cell 1	17.4	18.8	23.7	24.6	30.1	29.1
puncta per cell 2	27.5	34.1	30.3	38.8	34.1	25.1		puncta per cell 2	11.5	16.5	21.9	23.4	25.2	28.7		puncta per cell 2	4.8	3.5	3.9	3.9	5.5	7.8		puncta per cell 2	10.1	15.1	23.9	24.6	26.2	32.2
puncta per cell 3	16	31.8	40.4	38	36.1	22.6		puncta per cell 3	4.2	18.725	22.51	24.9	33.2	31.6		puncta per cell 3	5.5	5.8	5.7	5.9	7.1	4.9		puncta per cell 3	7.8	15.1	26.7	28.6	33.2	35.1
puncta per cell Average	20.9	34.0333	35.7	37.3	36.3	23.7333		puncta per cell Average	8.4	18.9833	23.51	24.9	29.6	31.2333		puncta per cell Average	4.6	4.8	4.6	3.86667	7.23333	7.93333		puncta per cell Average	11.7667	16.3	24.7667	25.9333	29.8333	32.1333
puncta per cell Average STDEV	4.8463	1.79691	4.8	2.4	2.3	1.03387		puncta per cell Average STDEV	3.5	2.1409	1.4	1.22474	3.31461	1.9362		puncta per cell Average STDEV	1.25	1.35	1.4	1.67398	1.47271	2.53289		puncta per cell Average STDEV	4.09254	2.4	1.36951	1.88562	2.86395	2.44994

## Sheet: 2D
	αSacetyl PFF	αSacetyl PFF + Heparinase	αSun PFF	αSunPFF + Heparinase
	αS puncta per cell	αS puncta per cell	αS puncta per cell	αS puncta per cell
Repeat 1	29.3	22.4	27.5	3.8
Repeat 2	34.9	32.1	31.1	11.9
Repeat 3	27.3	25.8	23.8	4.8
Average	30.5	26.7667	27.5	6.8
STDEV	3.21662	4.01857	2.98	3.6

## Sheet: 2E
	αSacetyl	αSacetyl + PNGase F	αSacetyl PFF	αSacetyl PFF + PNGase F	αSun	αSun + PNGase F	αSun PFF	αSun PFF + PNGase F
	αS puncta per cell	αS puncta per cell	αS puncta per cell	αS puncta per cell	αS puncta per cell	αS puncta per cell	αS puncta per cell	αS puncta per cell
Repeat 1	34.1	2.7	34.8	1.8	12.2	20.8	18.9	15.2
Repeat 2	25.2	1.3	32.4	10.1	17.9	16.9	16.1	19.2
Repeat 3	22.8	6.8	28.2	7.4	22.7	11.8	25.2	25.8
Average	27.3667	3.6	31.8	6.43333	17.6	16.5	20.0667	20.0667
STDEV	4.86096	2.33381	2.72764	3.45672	4.29185	3.68511	3.80555	4.37061

## Sheet: 3A
	αSacetyl	αSacetyl + PNGase F	αSacetyl PFF	αSacetyl PFF + PNGase F
	fluorescence (a.u.)	fluorescence (a.u.)	fluorescence (a.u.)	fluorescence (a.u.)
Repeat 1	39891	2795.95	34797.8	3128.78
Repeat 2	36093.3	2030.56	31580.5	1495.61
Repeat 3	24198.3	2631.97	40892	5071.79
Average	33394.2	2486.16	35756.8	3232.06
STDEV	6684.73	329.04	3861.38	1461.79

## Sheet: 3B
	αSun	αSun + PNGase F	αSun PFF	αSun PFF + PNGase F
	fluorescence (a.u.)	fluorescence (a.u.)	fluorescence (a.u.)	fluorescence (a.u.)
Repeat 1	39005.2	25893.5	34993.3	40095.4
Repeat 2	18004.3	30892.7	25941.1	31960.8
Repeat 3	27102.2	23894.6	14834.5	20849.5
Average	28037.2	26893.6	25256.3	30968.6
STDEV	8599.07	2943.19	8244.03	7359.35

## Sheet: 4C
	αSacetyl	αSacetyl + PNGase F	αSun	αSun PFF + PNGase F
	N ( in solution)	N ( in solution)	N ( in solution)	N ( in solution)
Repeat 1	9	59	37	36
Repeat 2	11	57	43	44
Repeat 3	14	51	41	41
Average	11.3	55.6	40.3333	40.3333
STDEV	2.3	3.2	2.49444	3.29983

## Sheet: 4E
	(-)	(+) Heparinase	(+) Endo H	(+) PNGase F
	N ( in solution)	N ( in solution)	N ( in solution)	N ( in solution)
Repeat 1	9	22	21	59
Repeat 2	11	19	26	57
Repeat 3	14	17	22	51
Average	11.3333	19.3333	23	55.6667
STDEV	2.0548	2.0548	2.16025	3.39935

## Sheet: 5A
	αSacetyl (-) PNGase F	αSacetyl (+) PNGase F
	ETeff	ETeff
Repeat 1	0.33	0.18
Repeat 2	0.53	0.12
Repeat 3	0.44	0.26
Average	0.43	0.186667
STDEV	0.08	0.0573488

## Sheet: 5B
	αSun (-) PNGase F	αSun (+) PNGase F
	ETeff	ETeff
Repeat 1	0.29	0.21
Repeat 2	0.21	0.13
Repeat 3	0.14	0.17
Average	0.213333	0.17
STDEV	0.0612826	0.0326599

[truncated: 21 more sheets: 6A, 6B, 6C, 6D, 7C, 7F, S1A, S1C, S2B, S3, S4, S5B, S5E, S6D, S7A, S7B, S7C, S7D, S7E, S8B …]
